# Supplementary material for: Aging With a Liver Graft: Analysis of Very Long‐ Term Survivors after Liver Transplantation
Source: Preprints.org preprint supplement (doi:10.20944/preprints202401.0942.v1), 2024-01-11
Supplement: Supplementary file 1 [file supplementary]

**Supplementary table 1:** Maintenance immunosuppression in survivors.

| **Regimen** | **N* (%)**  **(#123)** |
| --- | --- |
| TAC monotherapy | 47 (38.2) |
| ME-CyA monotherapy | 36 (29.2) |
| EVR monotherapy | 17 (13.8) |
| TAC + EVR | 11 (8.9) |
| TAC + MMF (AZA) | 9 (7.3) |
| TAC + MMF (AZA) + S | 3 (2.4) |

NOTE: AZA, azathioprine; CyA, cyclosporine; EVR, everolimus; ME, microemulsion; MMF, mycophenolate mofetil; S, steroids; TAC, tacrolimus.
